# Supplementary material for: Comparative Application of Terminal Restriction Fragment Analysis Tools to Large-Scale Genomic Assays
Source: MDPI journal article supplement (doi:10.3390/ijms242417194), 2023-12-06
Supplement: s1 [file s1]

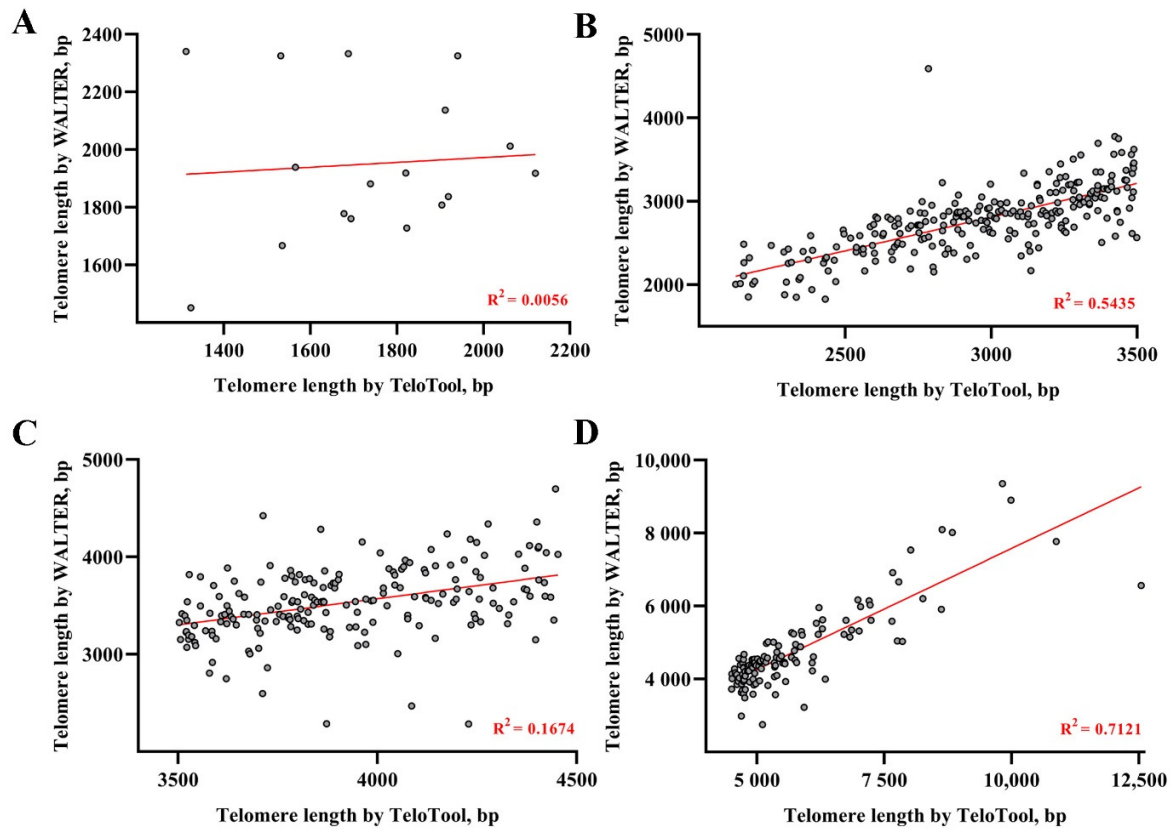

**Supplementary Figure S1. Analysis of differences in telomere length measurements between TeloTool and WALTER programs for selected length intervals.** Telomere length values for (A) short ( $\leq 2,100$  bp), (B) medium (2,101-3,500 bp), (C) long (3,501-4,500 bp), and (D) very long ( $\geq 4,501$  bp) intervals are plotted. Trend lines are shown in red.

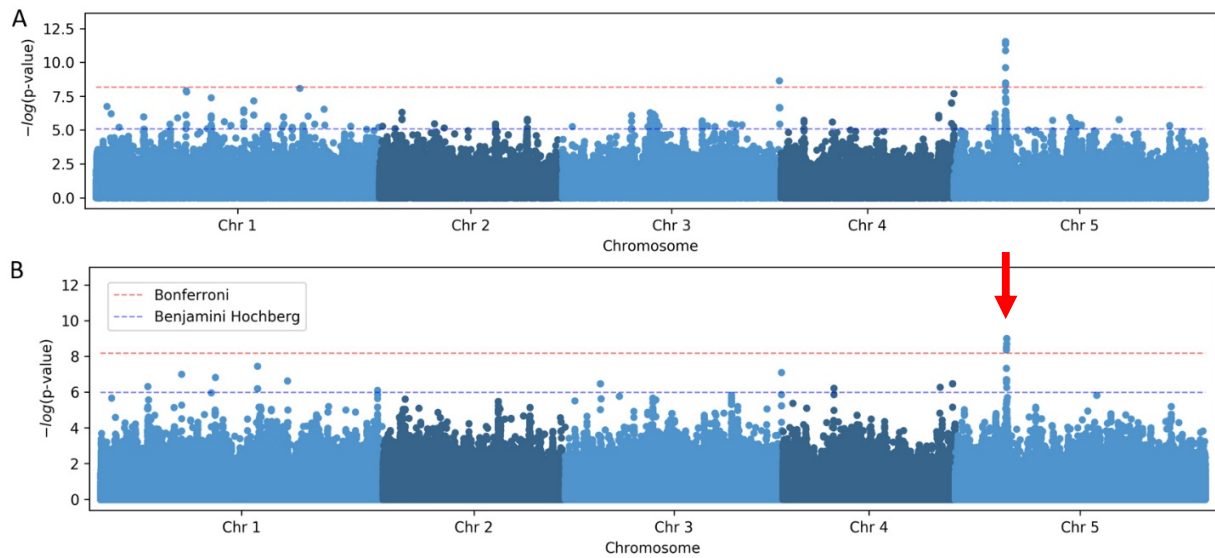

**Supplementary Figure S2. GWAS of *A. thaliana* telomere length variation using the accelerated linear mixed model (AMM) method.** Manhattan plot of the genome-wide  $P$ -values indicating the strongest associations between the five *Arabidopsis* chromosomes and telomere length data obtained from TeloTool (A) and WALTER (B). Red dotted lines indicate the Bonferroni-corrected significance threshold ( $\alpha = 0.05$ ). The GWAS-significant region inside the *TERT* gene discovered with both the TeloTool and WALTER datasets is indicated by a red arrow.

**Supplemental Table S1. Notable features of TeloTool and WALTER programs.**

| <b>Program name</b>                       | <b>TeloTool</b>                                                                                                                                                                                                                                                                                                                  | <b>WALTER</b>                                                                                                                                                                                                                                                                                                                                                                                                                                                                                                                     |
|-------------------------------------------|----------------------------------------------------------------------------------------------------------------------------------------------------------------------------------------------------------------------------------------------------------------------------------------------------------------------------------|-----------------------------------------------------------------------------------------------------------------------------------------------------------------------------------------------------------------------------------------------------------------------------------------------------------------------------------------------------------------------------------------------------------------------------------------------------------------------------------------------------------------------------------|
| Reference                                 | Gohring et al., 2014,<br>doi:10.1093/nar/gkt1315                                                                                                                                                                                                                                                                                 | Lyčka et al., 2021,<br>doi:10.1186/s12859-021-04064-0                                                                                                                                                                                                                                                                                                                                                                                                                                                                             |
| Download requirements                     | Both TeloTool and MATLAB are required.                                                                                                                                                                                                                                                                                           | Works either over internet (requires uploading two files in xls and html format) or offline (requires downloading WALTER toolset v2.0 Portable)                                                                                                                                                                                                                                                                                                                                                                                   |
| Track recognition method                  | Automatic by the Otsu method                                                                                                                                                                                                                                                                                                     | Manual (user marks a track)                                                                                                                                                                                                                                                                                                                                                                                                                                                                                                       |
| Method for recognizing track width        | Automatically recognized (can be adjusted using the 'Filter for Lane Width' button)                                                                                                                                                                                                                                              | Manual (user marks the track width)                                                                                                                                                                                                                                                                                                                                                                                                                                                                                               |
| DNA size marker specification and fitting | $R^2_{adj} = 1 - \left( \frac{SS_{res}}{SS_{tot}} \right) * \left( \frac{N - 1}{N - d - 1} \right);$ <p> <math>R^2_{adj}</math>- is adjusted coefficient of determination;<br/> d- is the degrees of freedom of the polinomial;<br/> SS<sub>res</sub>-residual sum of squares;<br/> SS<sub>tot</sub>- total sum of squares. </p> | ANOVA hypothesis                                                                                                                                                                                                                                                                                                                                                                                                                                                                                                                  |
| Data analysis method                      | <p>Data described by a Gaussian curve</p> $f(x) = \frac{1}{\sigma\sqrt{2\pi}} * e^{-\frac{(x-\mu)^2}{2\sigma^2}}$ <p> <math>\mu</math> is the mean deviation of the Distribution;<br/> <math>\sigma</math> is the standard deviation of the distribution </p>                                                                    | $OD_{lt} = OD_{lb} + W(OD_{lmax} - OD_{lb})$ $OD_{rt} = OD_{rb} + W(OD_{rmax} - OD_{rb})$ <p> OD<sub>lt</sub>, intensity values for the left;<br/> OD<sub>rt</sub>, intensity values for the right;<br/> OD<sub>lmax</sub>, the maximum signal intensity within the sequence;<br/> OD<sub>lb</sub>, the lowest intensity value within the sequence;<br/> OD<sub>rb</sub>, the lowest intensity value within the sequence OD<sub>rmax</sub>;<br/> W, a constant describing the width of the chosen area with its value set by </p> |

|                          |                                                                                                                                                                                                                                                                                                                                                                                                                                                                                                                                                                   |                                                                                                                                                                                                |
|--------------------------|-------------------------------------------------------------------------------------------------------------------------------------------------------------------------------------------------------------------------------------------------------------------------------------------------------------------------------------------------------------------------------------------------------------------------------------------------------------------------------------------------------------------------------------------------------------------|------------------------------------------------------------------------------------------------------------------------------------------------------------------------------------------------|
|                          |                                                                                                                                                                                                                                                                                                                                                                                                                                                                                                                                                                   | default to 0.28 based on empirical testing.                                                                                                                                                    |
| Background correction    | <p>Three options are available:</p> <p>1) The software 'trendline' function identifies the lowest values among the initial and final 10 pixels of each lane. It then calculates a line connecting these points along the lane before deducing the trendline from the raw data;</p> <p>2) the 'baseline' option calculates the mean between the two values in 1) and subtracts the mean from the original data;</p> <p>3) The background of the gel can be defined manually by the user. The mean value of this area can then be subtracted from the raw data.</p> | Background correction is based on the a linear model constructed from two points located to the left and right of the telomere-specific signal (similar to TeloTool, but area is much larger). |
| Image upload format      | tiff                                                                                                                                                                                                                                                                                                                                                                                                                                                                                                                                                              | jpeg                                                                                                                                                                                           |
| Editing the image        | Directly in the app                                                                                                                                                                                                                                                                                                                                                                                                                                                                                                                                               | With ScanToIntensity                                                                                                                                                                           |
| Area of signal intensity | Determined automatically                                                                                                                                                                                                                                                                                                                                                                                                                                                                                                                                          | Determined automatically, but can be adjusted manually                                                                                                                                         |
| Report file upload       | In xls format                                                                                                                                                                                                                                                                                                                                                                                                                                                                                                                                                     | In HTML format                                                                                                                                                                                 |
